# Supplementary material for: Sea ice and pollution-modulated changes in Greenland ice core methanesulfonate and bromine
Source: Copernicus journal article supplement (doi:10.5194/cp-13-39-2017), 2017-01-16
Supplement: Supplementary file 1 [file cp-13-39-2017-supplement.zip]

The Supplement related to this article is available online at  
doi:10.5194/cp-12-1-2016-supplement.

**Acknowledgements.** This research was funded by the National Science Foundation; grant numbers 1023672 and 1204176.

Edited by: K. Goto-Azuma

Reviewed by: two anonymous referees

## References

- Abbatt, J., Oldridge, N., Symington, A., Chukalovskiy, V., McWhinney, R. D., Sjostedt, S., and Cox, R. A.: Release of gas-phase halogens by photolytic generation of OH in frozen halide-nitrate solutions: an active halogen formation mechanism?, *J. Phys. Chem. A*, 114, 6527–6533, doi:10.1021/jp102072t, 2010.
- Abbatt, J. P. D.: Interactions of HBr, HCl, and HOBr With Supercooled Sulfuric-Acid-Solutions of Stratospheric Composition, *J. Geophys. Res.*, 100, 14009–14017, 1995.
- Abbatt, J. P. D., Thomas, J. L., Abrahamsson, K., Boxe, C., Granfors, A., Jones, A. E., King, M. D., Saiz-Lopez, A., Shepson, P. B., Sodeau, J., Toohey, D. W., Toubin, C., von Glasow, R., Wren, S. N., and Yang, X.: Halogen activation via interactions with environmental ice and snow in the polar lower troposphere and other regions, *Atmos. Chem. Phys.*, 12, 6237–6271, doi:10.5194/acp-12-6237-2012, 2012.
- Abram, N. J., Wolff, E. W., and Curran, M. A. J.: A review of sea ice proxy information from polar ice cores, *Quaternary Sci. Rev.*, 79, 168–183, doi:10.1016/j.quascirev.2013.01.011, 2013.
- Appenzeller, C., Schwander, J., Sommer, S., and Stocker, T. F.: The North Atlantic Oscillation and its imprint on precipitation and ice accumulation in Greenland, *Geophys. Res. Lett.*, 25, 1939, doi:10.1029/98GL01227, 1998.
- Arienzo, M. M., McConnell, J. R., Chellman, N., Criscitiello, A. S., Curran, M., Fritzsche, D., Kipfstuhl, S., Mulvaney, R., Nolan, M., Opel, T., Sigl, M., and Steffensen, J. P.: A Method for Continuous  $^{239}\text{Pu}$  Determinations in Arctic and Antarctic Ice Cores, *Environ. Sci. Technol.*, 50, 7066–7073, doi:10.1021/acs.est.6b01108, 2016.
- Barrie, L. A., Hoff, R. M., and Daggupaty, S. M.: The influence of mid-latitude pollution sources on haze in the Canadian arctic, *Atmos. Environ.*, 15, 1407–1419, doi:10.1016/0004-6981(81)90347-4, 1981.
- Berg, W. W., Sperry, P. D., Rahn, K. A., and Gladney, E. S.: Atmospheric Bromine in the Arctic, *J. Geophys. Res.*, 88, 6719–6736, doi:10.1029/JC088iC11p06719, 1983.
- Bertram, F. J. and Kolowich, J. B.: A study of methyl bromide emissions from automobiles burning leaded gasoline using standardized vehicle testing procedures, *Geophys. Res. Lett.*, 27, 1423–1426, doi:10.1029/1999GL011008, 2000.
- Bigler, M., Wagenbach, D., Fischer, H., Kipfstuhl, J., Miller, H., Sommer, S., and Stauffer, B.: Sulphate record from a northeast Greenland ice core over the last 1200 years based on continuous flow analysis, *Ann. Glaciol.*, 35, 250–256, doi:10.3189/172756402781817158, 2002.
- Bowen, H. J. M. (Ed.): *Environmental chemistry of the elements*, BOOK, Academic Press, London, New York, 1979.
- Chellman, N. J., Hastings, M. G., and McConnell, J. R.: Increased nitrate and decreased  $\delta^{15}\text{N-NO}_3^-$  in the Greenland Arctic after 1940 attributed to North American oil burning, *The Cryosphere Discuss.*, doi:10.5194/tc-2016-163, in review, 2016.
- Chen, Q. S., Bromwich, D. H., and Bai, L.: Precipitation over Greenland retrieved by a dynamic method and its relation to cyclonic activity, *J. Climate*, 10, 839–870, 1997.
- Chu, L. and Anastasio, C.: Formation of hydroxyl radical from the photolysis of frozen hydrogen peroxide, *J. Phys. Chem. A*, 109, 6264–6271, doi:10.1021/jp051415f, 2005.
- Curran, M. A. J. and Jones, G. B.: Dimethyl sulfide in the Southern Ocean: Seasonality and flux, *J. Geophys. Res.*, 105, 20451, doi:10.1029/2000JD900176, 2000.
- Curran, M. A. J., van Ommen, T. D., Morgan, V. I., Phillips, K. L., and Palmer, A. S.: Ice core evidence for Antarctic sea ice decline since the 1950s., *Science*, 302, 1203–1206, doi:10.1126/science.1087888, 2003.
- Draxler, R. R. and Hess, G. D.: An Overview of the HYSPLIT\_4 Modelling System for Trajectories, Dispersion, and Deposition, *Aust. Meteorol. Mag.*, 47, 295–308, 1998.
- Fan, S.-M. and Jacob, D. J.: Surface ozone depletion in Arctic spring sustained by bromine reactions on aerosols, *Nature*, 359, 522–524, doi:10.1038/359522a0, 1992.
- Felix, J. D. and Elliott, E. M.: The agricultural history of human-nitrogen interactions as recorded in ice core  $\delta^{15}\text{N-NO}_3^-$ , *Geophys. Res. Lett.*, 40, 1642–1646, doi:10.1002/grl.50209, 2013.
- Finlayson-Pitts, B. J.: The Tropospheric Chemistry of Sea Salt: A Molecular-Level View of the Chemistry of NaCl and NaBr, *Chem. Rev.*, 103, 4801–4822, doi:10.1021/cr020653t, 2003.
- Fischer, H. and Wagenbach, D.: Large-scale spatial trends in recent firn chemistry along an east-west transect through central Greenland, *Atmos. Environ.*, 30, 3227–3238, doi:10.1016/1352-2310(96)00092-1, 1996.
- Frinak, E. K. and Abbatt, J. P. D.:  $\text{Br}_2$  production from the heterogeneous reaction of gas-phase OH with aqueous salt solutions: Impacts of acidity, halide concentration, and organic surfactants, *J. Phys. Chem. A*, 110, 10456–10464, doi:10.1021/jp063165o, 2006.
- George, I. J. and Anastasio, C.: Release of gaseous bromine from the photolysis of nitrate and hydrogen peroxide in simulated sea-salt solutions, *Atmos. Environ.*, 41, 543–553, doi:10.1016/j.atmosenv.2006.08.022, 2007.
- Hunke, E. C., Notz, D., Turner, A. K., and Vancoppenolle, M.: The multiphase physics of sea ice: a review for model developers, *The Cryosphere*, 5, 989–1009, doi:10.5194/tc-5-989-2011, 2011.
- Jacobi, H. W., Kleffmann, J., Villena, G., Wiesen, P., King, M., France, J., Anastasio, C., and Staebler, R.: Role of nitrite in the photochemical formation of radicals in the snow, *Environ. Sci. Technol.*, 48, 165–172, doi:10.1021/es404002c, 2014.
- Jaffrezo, J. L., Davidson, C. I., Legrand, M., and Dibb, J. E.: Sulfate and MSA in the air and snow on the Greenland Ice Sheet, *J. Geophys. Res.*, 99, 1241–1253, doi:10.1029/93JD02913, 1994.
- Kahl, J. D. W., Martinez, D. A., Kuhns, H., Davidson, C. I., Jaffrezo, J. L., and Harris, J. M.: Air mass trajectories to Summit, Greenland?: A 44-year climatology and some episodic events, *J. Geophys. Res.-Ocean.*, 102, 26861–26875, 1997.
- Kerkweg, A., Jöckel, P., Warwick, N., Gebhardt, S., Brenninkmeijer, C. A. M., and Lelieveld, J.: Consistent simulation of bromine chemistry from the marine boundary layer to the stratosphere

- Part 2: Bromocarbons, *Atmos. Chem. Phys.*, 8, 5919–5939, doi:10.5194/acp-8-5919-2008, 2008.
- Kinnard, C., Zdanowicz, C. M., Koerner, R. M., and Fisher, D. A.: A changing Arctic seasonal ice zone: Observations from 1870–2003 and possible oceanographic consequences, *Geophys. Res. Lett.*, 35, 2–6, doi:10.1029/2007GL032507, 2008.
- Lamarque, J.-F., Dentener, F., McConnell, J., Ro, C.-U., Shaw, M., Vet, R., Bergmann, D., Cameron-Smith, P., Dalsoren, S., Doherty, R., Faluvegi, G., Ghan, S. J., Josse, B., Lee, Y. H., MacKenzie, I. A., Plummer, D., Shindell, D. T., Skeie, R. B., Stevenson, D. S., Strode, S., Zeng, G., Curran, M., Dahl-Jensen, D., Das, S., Fritzsche, D., and Nolan, M.: Multi-model mean nitrogen and sulfur deposition from the Atmospheric Chemistry and Climate Model Intercomparison Project (ACCMIP): evaluation of historical and projected future changes, *Atmos. Chem. Phys.*, 13, 7997–8018, doi:10.5194/acp-13-7997-2013, 2013.
- Langendörfer, U., Lehrer, E., Wagenbach, D., and Platt, U.: Observation of filterable bromine variabilities during Arctic tropospheric ozone depletion events in high (1 hour) time resolution, *J. Atmos. Chem.*, 34, 39–54, doi:10.1023/A:1006217001008, 1999.
- Legrand, M., Hammer, C., De Angelis, M., Savarino, J., Delmas, R., Clausen, H., and Johnsen, S. J.: Sulfur-containing species (methanesulfonate and  $\text{SO}_4$ ) over the last climatic cycle in the Greenland Ice Core Project (central Greenland) ice core, *J. Geophys. Res.*, 102, 26663, doi:10.1029/97JC01436, 1997.
- Lehrer, E., Wagenbach, D., and Platt, U.: Aerosol chemical composition during tropospheric ozone depletion at Ny Ålesund/Svalbard, *Tellus B*, 49, 1600–0889, doi:10.3402/tellusb.v49i5.15987, 1997.
- Leu, E., Mundy, C. J., Assmy, P., Campbell, K., Gabrielsen, T. M., Gosselin, M., Juul-Pedersen, T., and Gradinger, R.: Arctic spring awakening – Steering principles behind the phenology of vernal ice algal blooms, *Prog. Oceanogr.*, 139, 151–170, doi:10.1016/j.pocean.2015.07.012, 2015.
- Li, S.-M. and Barrie, L. A.: Biogenic sulfur aerosol in the Arctic troposphere: 1. Contributions to total sulfate, *J. Geophys. Res.*, 98, 20613, doi:10.1029/93JD02234, 1993.
- Macias Fauria, M., Grinsted, A., Helama, S., Moore, J., Timonen, M., Martma, T., Isaksson, E., and Eronen, M.: Unprecedented low twentieth century winter sea ice extent in the Western Nordic Seas since A.D. 1200, *Clim. Dynam.*, 34, 781–795, doi:10.1007/s00382-009-0610-z, 2010.
- Mann, M. E., Bradley, R. S., and Hughes, M. K.: Global-scale temperature patterns and climate forcing over the past six centuries, *Nature*, 392, 779–787, doi:10.1038/33859, 1998.
- Maselli, O. J., Fritzsche, D., Layman, L., McConnell, J. R., and Meyer, H.: Comparison of water isotope-ratio determinations using two cavity ring-down instruments and classical mass spectrometry in continuous ice-core analysis, *Isotopes Environ. Health Stud.*, 49, 387–98, doi:10.1080/10256016.2013.781598, 2013.
- McConnell, J. R. and Edwards, R.: Coal burning leaves toxic heavy metal legacy in the Arctic, *P. Natl. Acad. Sci. USA*, 105, 12140–12144, doi:10.1073/pnas.0803564105, 2008.
- McConnell, J. R., Lamorey, G. W., Lambert, S. W., and Taylor, K. C.: Continuous ice-core chemical analyses using inductively coupled plasma mass spectrometry, *Environ. Sci. Technol.*, 36, 7–11, doi:10.1021/es011088z, 2002.
- McConnell, J. R., Edwards, R., Kok, G. L., Flanner, M. G., Zender, C. S., Saltzman, E. S., Banta, J. R., Pasteris, D. R., Carter, M. M., and Kahl, J. D. W.: 20th-Century Industrial Black Carbon Emissions Altered Arctic Climate Forcing, *Science*, 317, 1381–1384, doi:10.1126/science.1144856, 2007.
- Millero, F. J.: The Physical Chemistry of Seawater, *Annu. Rev. Earth Planet. Sc.*, 2, 101–150, doi:10.1146/annurev.ea.02.050174.000533, 1974.
- Moldanová, J. and Ljungström, E.: Sea-salt aerosol chemistry in coastal areas: A model study, *J. Geophys. Res.*, 106, 1271, doi:10.1029/2000JD900462, 2001.
- Montzka, S. and Reimann, S.: Scientific Assessment of Ozone Depletion 2010: Scientific Summary Chapter 1 Ozone-Depleting Substances (ODSs) and Related Chemicals, available at: <http://www.esrl.noaa.gov/csd/assessments/ozone/2010/summary/ch1.html> (last access: 23 December 2015), 2010.
- Morin, S., Savarino, J., Frey, M. M., Yan, N., Bekki, S., Bottenheim, J., and Martins, J. M. F.: Tracing the origin and fate of  $\text{NO}_x$  in the Arctic atmosphere using stable isotopes in nitrate, *Science*, 322, 730–732, doi:10.1126/science.1161910, 2008.
- Mulvaney, R., Pasteur, E. C., Peel, D. A., Saltzman, E. S., and Whung, P.-Y.: The ratio of MSA to non-sea-salt sulphate in Antarctic Peninsula ice cores, *Tellus B*, 44, 1600–0889, doi:10.3402/tellusb.v44i4.15457, 1992.
- Nghiem, S. V., Rigor, I. G., Richter, A., Burrows, J. P., Shepson, P. B., Bottenheim, J., Barber, D. G., Steffen, A., Latonas, J., Wang, F., Stern, G., Clemente-Colón, P., Martin, S., Hall, D. K., Kaleschke, L., Tackett, P., Neumann, G., and Asplin, M. G.: Field and satellite observations of the formation and distribution of Arctic atmospheric bromine above a rejuvenated sea ice cover, *J. Geophys. Res.-Atmos.*, 117, D00S05, doi:10.1029/2011JD016268, 2012.
- Nriagu, J. O.: The rise and fall of leaded gasoline, *Sci. Total Environ.*, 92, 13–28, 1990.
- NSIDC (National Snow and Ice Data Center): available at: <http://nsidc.org/cryosphere/seaice/data/terminology.html>, last access: December 2013.
- O'Dwyer, J., Isaksson, E., Vinje, T., Jauhiainen, T., Moore, J., Pohjola, V., Vaikmaa, R., and van de Wal, R. S. W.: Methanesulfonic acid in a Svalbard ice core as an indicator of ocean climate, *Geophys. Res. Lett.*, 27, 1159–1162, doi:10.1029/1999GL011106, 2000.
- Ordóñez, C., Lamarque, J.-F., Tilmes, S., Kinnison, D. E., Atlas, E. L., Blake, D. R., Sousa Santos, G., Brasseur, G., and Saiz-Lopez, A.: Bromine and iodine chemistry in a global chemistry-climate model: description and evaluation of very short-lived oceanic sources, *Atmos. Chem. Phys.*, 12, 1423–1447, doi:10.5194/acp-12-1423-2012, 2012.
- Oudijk, G.: The Rise and Fall of Organometallic Additives in Automotive Gasoline, *Environ. Forensics*, 11, 17–49, doi:10.1080/15275920903346794, 2010.
- Parrella, J. P., Jacob, D. J., Liang, Q., Zhang, Y., Mickley, L. J., Miller, B., Evans, M. J., Yang, X., Pyle, J. A., Theys, N., and Van Roozendael, M.: Tropospheric bromine chemistry: implications for present and pre-industrial ozone and mercury, *Atmos. Chem. Phys.*, 12, 6723–6740, doi:10.5194/acp-12-6723-2012, 2012.
- Pasteris, D. R., McConnell, J. R., and Edwards, R.: High-resolution, continuous method for measurement of acidity in ice cores, *En-*

- viron. Sci. Technol., 46, 1659–1666, doi:10.1021/es202668n, 2012.
- Pratt, K. A., Custard, K. D., Shepson, P. B., Douglas, T. A., Pöhler, D., General, S., Zielcke, J., Simpson, W. R., Platt, U., Tanner, D. J., Gregory Huey, L., Carlsen, M., and Stirm, B. H.: Photochemical production of molecular bromine in Arctic surface snowpacks, *Nat. Geosci.*, 6, 351–356, doi:10.1038/ngeo1779, 2013.
- Rankin, A. M., Wolff, E. W., and Martin, S.: Frost flowers: Implications for tropospheric chemistry and ice core interpretation, *J. Geophys. Res.-Atmos.*, 107, 4683, doi:10.1029/2002JD002492, 2002.
- Rayner, N. A.: Global analyses of sea surface temperature, sea ice, and night marine air temperature since the late nineteenth century, *J. Geophys. Res.*, 108, 4407, doi:10.1029/2002JD002670, 2003.
- Röthlisberger, R., Bigler, M., Hutterli, M., Sommer, S., Stauffer, B., Junghans, H. G., and Wagenbach, D.: Technique for continuous high-resolution analysis of trace substances in firn and ice cores, *Environ. Sci. Technol.*, 34, 338–342, doi:10.1021/es9907055, 2000.
- Röthlisberger, R., Mulvaney, R., Wolff, E. W., Hutterli, M. A., Bigler, M., Sommer, S., and Jouzel, J.: Dust and sea salt variability in central East Antarctica (Dome C) over the last 45 kyrs and its implications for southern high-latitude climate, *Geophys. Res. Lett.*, 29, 1–4, doi:10.1029/2003GL016936, 2002.
- Saltzman, E. S., Dioumaeva, I., and Finley, B. D.: Glacial/interglacial variations in methanesulfonate (MSA) in the Siple Dome ice core, West Antarctica, *Geophys. Res. Lett.*, 33, 1–4, doi:10.1029/2005GL025629, 2006.
- Sander, R., Rudich, Y., von Glasow, R., and Crutzen, P. J.: The role of BrNO<sub>3</sub> in marine tropospheric chemistry: A model study, *Geophys. Res. Lett.*, 26, 2857–2860, doi:10.1029/1999GL000478, 1999.
- Sander, R., Keene, W. C., Pszenny, A. A. P., Arimoto, R., Ayers, G. P., Baboukas, E., Cainey, J. M., Crutzen, P. J., Duce, R. A., Hönninger, G., Huebert, B. J., Maenhaut, W., Mihalopoulos, N., Turekian, V. C., and Van Dingenen, R.: Inorganic bromine in the marine boundary layer: a critical review, *Atmos. Chem. Phys.*, 3, 1301–1336, doi:10.5194/acp-3-1301-2003, 2003.
- Schönhardt, A., Begoin, M., Richter, A., Wittrock, F., Kaleschke, L., Gómez Martín, J. C., and Burrows, J. P.: Simultaneous satellite observations of IO and BrO over Antarctica, *Atmos. Chem. Phys.*, 12, 6565–6580, doi:10.5194/acp-12-6565-2012, 2012.
- Sharma, S., Chan, E., Ishizawa, M., Toom-Sauntry, D., Gong, S. L., Li, S. M., Tarasick, D. W., Leaitch, W. R., Norman, A., Quinn, P. K., Bates, T. S., Levasseur, M., Barrie, L. A., and Maenhaut, W.: Influence of transport and ocean ice extent on biogenic aerosol sulfur in the Arctic atmosphere, *J. Geophys. Res.-Atmos.*, 117, D12209, doi:10.1029/2011JD017074, 2012.
- Sigl, M., McConnell, J. R., Layman, L., Maselli, O. J., McGwire, K., Pasteris, D., Dahl-Jensen, D., Steffensen, J. P., Vinther, B., Edwards, R., Mulvaney, R., and Kipfstuhl, S.: A new bipolar ice core record of volcanism from WAIS Divide and NEEM and implications for climate forcing of the last 2000 years, *J. Geophys. Res.-Atmos.*, 118, 1151–1169, doi:10.1029/2012JD018603, 2013.
- Sigl, M., Winstrup, M., McConnell, J. R., Welten, K. C., Plunkett, G., Ludlow, F., Büntgen, U., Caffee, M., Chellman, N., Dahl-Jensen, D., Fischer, H., Kipfstuhl, S., Kostick, C., Maselli, O. J., Mekhaldi, F., Mulvaney, R., Muscheler, R., Pasteris, D. R., Pilcher, J. R., Salzer, M., Schüpbach, S., Steffensen, J. P., Vinther, B. M., and Woodruff, T. E.: Timing and climate forcing of volcanic eruptions for the past 2,500 years, *Nature*, 523, 543–9, doi:10.1038/nature14565, 2015.
- Simpson, W. R., von Glasow, R., Riedel, K., Anderson, P., Ariya, P., Bottenheim, J., Burrows, J., Carpenter, L. J., Frieß, U., Goodsite, M. E., Heard, D., Hutterli, M., Jacobi, H.-W., Kaleschke, L., Neff, B., Plane, J., Platt, U., Richter, A., Roscoe, H., Sander, R., Shepson, P., Sodeau, J., Steffen, A., Wagner, T., and Wolff, E.: Halogens and their role in polar boundary-layer ozone depletion, *Atmos. Chem. Phys.*, 7, 4375–4418, doi:10.5194/acp-7-4375-2007, 2007.
- Sjostedt, S. J., Huey, L. G., Tanner, D. J., Peischl, J., Chen, G., Dibb, J. E., Lefer, B., Hutterli, M. A., Beyersdorf, A. J., Blake, N. J., Blake, D. R., Sueper, D., Ryerson, T., Burkhardt, J., and Stohl, A.: Observations of hydroxyl and the sum of peroxy radicals at Summit, Greenland during summer 2003, *Atmos. Environ.*, 41, 5122–5137, doi:10.1016/j.atmosenv.2006.06.065, 2007.
- Smith, S. J., van Aardenne, J., Klimont, Z., Andres, R. J., Volke, A., and Delgado Arias, S.: Anthropogenic sulfur dioxide emissions: 1850–2005, *Atmos. Chem. Phys.*, 11, 1101–1116, doi:10.5194/acp-11-1101-2011, 2011.
- Spolaor, A., Vallelonga, P., Plane, J. M. C., Kehrwald, N., Gabrieli, J., Varin, C., Turetta, C., Cozzi, G., Kumar, R., Boutron, C., and Barbante, C.: Halogen species record Antarctic sea ice extent over glacial–interglacial periods, *Atmos. Chem. Phys.*, 13, 6623–6635, doi:10.5194/acp-13-6623-2013, 2013a.
- Spolaor, A., Gabrieli, J., Martma, T., Kohler, J., Björkman, M. B., Isaksson, E., Varin, C., Vallelonga, P., Plane, J. M. C., and Barbante, C.: Sea ice dynamics influence halogen deposition to Svalbard, *The Cryosphere*, 7, 1645–1658, doi:10.5194/tc-7-1645-2013, 2013b.
- Spolaor, A., Vallelonga, P., Gabrieli, J., Martma, T., Björkman, M. P., Isaksson, E., Cozzi, G., Turetta, C., Kjær, H. A., Curran, M. A. J., Moy, A. D., Schönhardt, A., Blechschmidt, A.-M., Burrows, J. P., Plane, J. M. C., and Barbante, C.: Seasonality of halogen deposition in polar snow and ice, *Atmos. Chem. Phys.*, 14, 9613–9622, doi:10.5194/acp-14-9613-2014, 2014.
- Spolaor, A., Opel, T., McConnell, J. R., Maselli, O. J., Spreen, G., Varin, C., Kirchgeorg, T., Fritzsche, D., Saiz-Lopez, A., and Vallelonga, P.: Halogen-based reconstruction of Russian Arctic sea ice area from the Akademii Nauk ice core (Severnaya Zemlya), *The Cryosphere*, 10, 245–256, doi:10.5194/tc-10-245-2016, 2016.
- Sturges, W. T. and Harrison, R. M.: Bromine: Lead ratios in airborne particles from urban and rural sites, *Atmos. Environ.*, 20, 577–588, doi:10.1016/0004-6981(86)90101-0, 1986.
- Thomas, J. L., Dibb, J. E., Huey, L. G., Liao, J., Tanner, D., Lefer, B., von Glasow, R., and Stutz, J.: Modeling chemistry in and above snow at Summit, Greenland – Part 2: Impact of snow-pack chemistry on the oxidation capacity of the boundary layer, *Atmos. Chem. Phys.*, 12, 6537–6554, doi:10.5194/acp-12-6537-2012, 2012.
- Thomas, V. M., Bedford, J. A., and Cicerone, R. J.: Bromine emissions from leaded gasoline, *Geophys. Res. Lett.*, 24, 1371–1374, doi:10.1029/97GL01243, 1997.
- Vestreng, V., Ntziachristos, L., Semb, A., Reis, S., Isaksen, I. S. A., and Tarrasón, L.: Evolution of NO<sub>x</sub> emissions in Europe with

- focus on road transport control measures, *Atmos. Chem. Phys.*, 9, 1503–1520, doi:10.5194/acp-9-1503-2009, 2009.
- Wagner, T., Leue, C., Wenig, M., Pfeilsticker, K., and Platt, U.: Spatial and temporal distribution of enhanced boundary layer BrO concentrations measured by the GOME instrument aboard ERS-2, *J. Geophys. Res.*, 106, 24225, doi:10.1029/2000JD000201, 2001.
- Wais Divide Project Memembers: Onset of deglacial warming in West Antarctica driven by local orbital forcing, *Nature*, 500, 440–444, doi:10.1038/nature12376, 2013.
- Walsh, J. E.: A data set on Northern Hemisphere sea ice extent, *Natl. Snow Ice Data Cent.*, 49–51, 1978. TS7
- Weißbach, S., Wegner, A., Opel, T., Oerter, H., Vinther, B. M., and Kipfstuhl, S.: Spatial and temporal oxygen isotope variability in northern Greenland – implications for a new climate record over the past millennium, *Clim. Past*, 12, 171–188, doi:10.5194/cp-12-171-2016, 2016.
- Weller, R.: Postdepositional losses of methane sulfonate, nitrate, and chloride at the European Project for Ice Coring in Antarctica deep-drilling site in Dronning Maud Land, Antarctica, *J. Geophys. Res.*, 109, 1–9, doi:10.1029/2003JD004189, 2004.
- WMO: Scientific Assessment of Ozone Depletion: 1994, Chapter 10: Methyl Bromide, Geneva, 1995.
- WMO: Scientific Assessment of Ozone Depletion: 2002, Chapter 1: Controlled Substances and Other Source Gases, Geneva TS8, 2002.
- Wolff, E. W.: Ice sheets and nitrogen, *Philos. T. R. Soc. Lond. B*, 368, 20130127, doi:10.1098/rstb.2013.0127, 2013.
- Wolff, E. W., Rankin, A. M., and Röthlisberger, R.: An ice core indicator of Antarctic sea ice production?, *Geophys. Res. Lett.*, 30, 2–5, doi:10.1029/2003GL018454, 2003.
- Xu, L., Russell, L. M., Somerville, R. C. J., and Quinn, P. K.: Frost flower aerosol effects on Arctic wintertime longwave cloud radiative forcing, *J. Geophys. Res.-Atmos.*, 118, 13282–13291, doi:10.1002/2013JD020554, 2013.
- Yang, X., Pyle, J. A., and Cox, R. A.: Sea salt aerosol production and bromine release: Role of snow on sea ice, *Geophys. Res. Lett.*, 35, 1–5, doi:10.1029/2008GL034536, 2008.
- Yang, X., Pyle, J. A., Cox, R. A., Theys, N., and Van Roozen-dael, M.: Snow-sourced bromine and its implications for polar tropospheric ozone, *Atmos. Chem. Phys.*, 10, 7763–7773, doi:10.5194/acp-10-7763-2010, 2010.
- Yung, Y. L., Pinto, J. P., Watson, R. T., and Sander, S. P.: Atmospheric Bromine and Ozone Perturbations in the Lower Stratosphere, *J. Atmos. Sci.*, 37, 339–353, doi:10.1175/1520-0469(1980)037<0339:ABAOPI>2.0.CO;2, 1980.
