# Supplementary material for: Sea ice and pollution-modulated changes in Greenland ice core methanesulfonate and bromine
Source: Copernicus journal article supplement (doi:10.5194/cp-13-39-2017), 2017-01-16
Supplement: Supplementary file 3 [file cp-13-39-2017-supplement.zip]

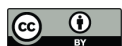

## *Supplement of*

# **Sea ice and pollution-modulated changes in Greenland ice core methanesulfonate and bromine**

**Olivia J. Maselli et al.**

*Correspondence to:* Olivia J. Maselli (olivia.maselli@gmail.com)

- cp-13-39-2017-supplement-title-page.pdf
- Supplement.pdf
- TunuDatabase\_submitted.csv
- Untitled1.pdf

The copyright of individual parts of the supplement might differ from the CC-BY 3.0 licence.
